# Supplementary material for: Patient reported distress can aid clinical decision making in idiopathic pulmonary fibrosis: analysis of the PROFILE cohort
Source: bioRxiv or medRxiv preprint supplement (doi:10.1101/460626), 2018-12-13
Supplement: Supplementary file [file 460626-1.pdf]

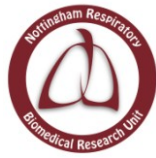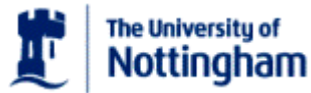

University of Nottingham & Nottingham  
Respiratory Biomedical Research Unit

## SPARC \*

We would like to know a bit more about you and your concerns.

Please fill in this questionnaire (with help from a relative or carer if needed) and return it to one of our team.

There are no "right" or "wrong" answers. If you are unsure of a question, please leave it blank.

THANK YOU

Your initials:.....

Date completed:...../...../.....

| <b>COMMUNICATION AND INFORMATION ISSUES</b>                                               |                          |                          |
|-------------------------------------------------------------------------------------------|--------------------------|--------------------------|
| <b>1. Have you been able to talk to any of the following people about your condition?</b> | <b>Yes</b>               | <b>No</b>                |
| a. Your doctor                                                                            | <input type="checkbox"/> | <input type="checkbox"/> |
| b. Community nurse                                                                        | <input type="checkbox"/> | <input type="checkbox"/> |
| c. Hospital nurse                                                                         | <input type="checkbox"/> | <input type="checkbox"/> |
| d. Religious advisor                                                                      | <input type="checkbox"/> | <input type="checkbox"/> |
| e. Social worker                                                                          | <input type="checkbox"/> | <input type="checkbox"/> |
| f. Family                                                                                 | <input type="checkbox"/> | <input type="checkbox"/> |
| g. Other people (please state): _____                                                     |                          |                          |

| <b>PHYSICAL SYMPTOMS</b>                                           |                                                              | Please circle <u>one</u> answer per line |                     |                    |                  |
|--------------------------------------------------------------------|--------------------------------------------------------------|------------------------------------------|---------------------|--------------------|------------------|
| <i>In the past month, have you been distressed or bothered by:</i> |                                                              | <b>Not at all</b>                        | <b>A little bit</b> | <b>Quite a bit</b> | <b>Very much</b> |
| <b>2.</b>                                                          | Pain?                                                        | 0                                        | 1                   | 2                  | 3                |
| <b>3.</b>                                                          | Loss of memory?                                              | 0                                        | 1                   | 2                  | 3                |
| <b>4.</b>                                                          | Headache?                                                    | 0                                        | 1                   | 2                  | 3                |
| <b>5.</b>                                                          | Dry mouth?                                                   | 0                                        | 1                   | 2                  | 3                |
| <b>6.</b>                                                          | Sore mouth?                                                  | 0                                        | 1                   | 2                  | 3                |
| <b>7.</b>                                                          | Shortness of breath?                                         | 0                                        | 1                   | 2                  | 3                |
| <b>8.</b>                                                          | Cough?                                                       | 0                                        | 1                   | 2                  | 3                |
| <b>9.</b>                                                          | Feeling sick (nausea)?                                       | 0                                        | 1                   | 2                  | 3                |
| <b>10.</b>                                                         | Being sick (vomiting)?                                       | 0                                        | 1                   | 2                  | 3                |
| <b>11.</b>                                                         | Bowel problems (e.g. constipation, diarrhoea, incontinence)? | 0                                        | 1                   | 2                  | 3                |
| <b>12.</b>                                                         | Bladder problems (urinary incontinence)?                     | 0                                        | 1                   | 2                  | 3                |
| <b>13.</b>                                                         | Feeling weak?                                                | 0                                        | 1                   | 2                  | 3                |
| <b>14.</b>                                                         | Feeling tired?                                               | 0                                        | 1                   | 2                  | 3                |
| <b>15.</b>                                                         | Problems sleeping at night?                                  | 0                                        | 1                   | 2                  | 3                |
| <b>16.</b>                                                         | Feeling sleepy during the day?                               | 0                                        | 1                   | 2                  | 3                |

| <b>PHYSICAL SYMPTOMS continued</b> |                                                   | <b>Not at all</b> | <b>A little bit</b> | <b>Quite a bit</b> | <b>Very much</b> |
|------------------------------------|---------------------------------------------------|-------------------|---------------------|--------------------|------------------|
| 17.                                | Loss of appetite?                                 | 0                 | 1                   | 2                  | 3                |
| 18.                                | Changes in your weight?                           | 0                 | 1                   | 2                  | 3                |
| 19.                                | Problems with swallowing?                         | 0                 | 1                   | 2                  | 3                |
| 20.                                | Being concerned about changes in your appearance? | 0                 | 1                   | 2                  | 3                |
| 21.                                | Feeling restless and agitated?                    | 0                 | 1                   | 2                  | 3                |
| 22.                                | Feeling that your symptoms are not controlled?    | 0                 | 1                   | 2                  | 3                |

| <b>PSYCHOLOGICAL ISSUES</b>                                               |                                                   | Please circle <u>one</u> answer per line |                     |                    |                  |
|---------------------------------------------------------------------------|---------------------------------------------------|------------------------------------------|---------------------|--------------------|------------------|
| <b><i>In the past month, have you been distressed or bothered by:</i></b> |                                                   | <b>Not at all</b>                        | <b>A little bit</b> | <b>Quite a bit</b> | <b>Very much</b> |
| 23.                                                                       | Feeling anxious?                                  | 0                                        | 1                   | 2                  | 3                |
| 24.                                                                       | Feeling as if you are in a low mood?              | 0                                        | 1                   | 2                  | 3                |
| 25.                                                                       | Feeling confused?                                 | 0                                        | 1                   | 2                  | 3                |
| 26.                                                                       | Feeling as if you are unable to concentrate?      | 0                                        | 1                   | 2                  | 3                |
| 27.                                                                       | Feeling lonely?                                   | 0                                        | 1                   | 2                  | 3                |
| 28.                                                                       | Feeling that everything is an effort?             | 0                                        | 1                   | 2                  | 3                |
| 29.                                                                       | Feeling that life is not worth living?            | 0                                        | 1                   | 2                  | 3                |
| 30.                                                                       | Thoughts about ending it all?                     | 0                                        | 1                   | 2                  | 3                |
| 31.                                                                       | The effect of your condition on your sexual life? | 0                                        | 1                   | 2                  | 3                |

| <b>RELIGIOUS AND SPIRITUAL ISSUES</b>                                     |                                             | Please circle <u>one</u> answer per line |                     |                    |                  |
|---------------------------------------------------------------------------|---------------------------------------------|------------------------------------------|---------------------|--------------------|------------------|
| <b><i>In the past month, have you been distressed or bothered by:</i></b> |                                             | <b>Not at all</b>                        | <b>A little bit</b> | <b>Quite a bit</b> | <b>Very much</b> |
| 32.                                                                       | Worrying thoughts about death or dying?     | 0                                        | 1                   | 2                  | 3                |
| 33.                                                                       | Religious or spiritual needs not being met? | 0                                        | 1                   | 2                  | 3                |

**INDEPENDENCE AND ACTIVITY**Please circle one answer per line

| <i><b>In the past month, have you been distressed or bothered by:</b></i> |                                                                                                                     | <b>Not at all</b> | <b>A little bit</b> | <b>Quite a bit</b> | <b>Very much</b> |
|---------------------------------------------------------------------------|---------------------------------------------------------------------------------------------------------------------|-------------------|---------------------|--------------------|------------------|
| <b>34.</b>                                                                | Losing your independence?                                                                                           | 0                 | 1                   | 2                  | 3                |
| <b>35.</b>                                                                | Changes in your ability to carry out your usual daily activities such as washing, bathing or going to the toilet?   | 0                 | 1                   | 2                  | 3                |
| <b>36.</b>                                                                | Changes in your ability to carry out your usual household tasks such as cooking for yourself or cleaning the house? | 0                 | 1                   | 2                  | 3                |

**FAMILY AND SOCIAL ISSUES**Please circle one answer per line

| <i><b>In the past month, have you been distressed or bothered by:</b></i> |                                                                                       | <b>Not at all</b> | <b>A little bit</b> | <b>Quite a bit</b> | <b>Very much</b> |
|---------------------------------------------------------------------------|---------------------------------------------------------------------------------------|-------------------|---------------------|--------------------|------------------|
| <b>37.</b>                                                                | Feeling that people do not understand what you want?                                  | 0                 | 1                   | 2                  | 3                |
| <b>38.</b>                                                                | Worrying about the effect that your illness is having on your family or other people? | 0                 | 1                   | 2                  | 3                |
| <b>39.</b>                                                                | Lack of support from your family or other people?                                     | 0                 | 1                   | 2                  | 3                |
| <b>40.</b>                                                                | Needing more help than your family or other people could give?                        | 0                 | 1                   | 2                  | 3                |

**TREATMENT ISSUES**Please circle one answer per line

| <i><b>In the past month, have you been distressed or bothered by:</b></i> |                                                     | <b>Not at all</b> | <b>A little bit</b> | <b>Quite a bit</b> | <b>Very much</b> |
|---------------------------------------------------------------------------|-----------------------------------------------------|-------------------|---------------------|--------------------|------------------|
| <b>41.</b>                                                                | Side effects from your treatment?                   | 0                 | 1                   | 2                  | 3                |
| <b>42.</b>                                                                | Worrying about long term effects of your treatment? | 0                 | 1                   | 2                  | 3                |

**PERSONAL ISSUES**

Yes No

- |            |                                                                                   |                          |                          |
|------------|-----------------------------------------------------------------------------------|--------------------------|--------------------------|
| <b>43.</b> | Do you need any help with your personal affairs?                                  | <input type="checkbox"/> | <input type="checkbox"/> |
| <b>44.</b> | Would you like to talk to another professional about your condition or treatment? | <input type="checkbox"/> | <input type="checkbox"/> |
| <b>45.</b> | <b>Would you like any more information about the following?</b>                   |                          |                          |
|            | a. Your condition                                                                 | <input type="checkbox"/> | <input type="checkbox"/> |
|            | b. Your care                                                                      | <input type="checkbox"/> | <input type="checkbox"/> |
|            | c. Your treatment                                                                 | <input type="checkbox"/> | <input type="checkbox"/> |
|            | d. Other types of support                                                         | <input type="checkbox"/> | <input type="checkbox"/> |
|            | e. Financial issues                                                               | <input type="checkbox"/> | <input type="checkbox"/> |
|            | f. Other (please state): _____                                                    |                          |                          |

**Are there any other concerns that you would like us to know about?**

*Carry on over the page if needed*

**You can use this section to jot down any questions that you want to ask your doctors or other caring professionals**

Question 1

Question 2

Question 3
